# Supplementary material for: Increased Susceptibility to Ethylmercury-Induced Mitochondrial Dysfunction in a Subset of Autism Lymphoblastoid Cell Lines
Source: J Toxicol. 2015 Jan 21;2015:573701. doi: 10.1155/2015/573701 (PMC4320799; doi:10.1155/2015/573701)
Supplement: Supplementary file 1 — The supplementary material contains the detailed results and figures for AD-N subgroup, including the comparisons between the AD-N LCLs and matched control LCLs (Figure S1) and the comparisons between the AD-N LCLs with and without NAC pretreatment (Figure S2). [file 573701.f1.pdf]

## Supplementary Results

### AD-N v control LCLs.

ATP-linked respiration was slightly higher in the AD-N as compared to control LCLs [F(1,442)=18.96,  $p<0.0001$ ]. While ATP-linked respiration decreased as mercury increased [F(6,59)=32.64,  $p<0.0001$ ], this decrease was not different between groups (Figure S1A). ATP-linked respiration was found to be significantly lower than baseline at 0.125 $\mu$ M [t(59)=2.13,  $p<0.05$ ], 0.25 $\mu$ M [t(59)=2.14,  $p<0.05$ ], 0.5 $\mu$ M [t(59)=4.60,  $p<0.0001$ ], 1.25 $\mu$ M [t(59)=7.58,  $p<0.0001$ ] and 2.5 $\mu$ M [t(59)=11.76,  $p<0.0001$ ].

Overall proton leak respiration was slightly but significantly higher in the AD-N as compared to the control LCLs [F(1,442)=38.16,  $p<0.0001$ ] (Figure S1B). Proton leak respiration significantly changed as mercury increased [F(6,59)=2.96,  $p<0.05$ ], but this change was not significantly different between the two groups. This change in proton leak respiration with increasing mercury was due to a significantly lower proton leak respiration at 2.5 $\mu$ M mercury as compared to baseline [t(59)=3.03,  $p<0.01$ ].

Maximal respiratory capacity was slightly higher in the AD-N as compared to control LCLs [F(1,442)=7.13,  $p<0.01$ ]. While maximal respiratory capacity decreased as mercury increased [F(6,59)=41.70,  $p<0.0001$ ], this decreased was not different between groups (Figure S1C). Maximal respiratory capacity was found to be significantly lower than baseline at 0.125 $\mu$ M [t(59)=2.01,  $p<0.05$ ], 0.25 $\mu$ M [t(59)=2.49,  $p<0.05$ ], 0.5 $\mu$ M [t(59)=5.69,  $p<0.0001$ ], 1.25 $\mu$ M [t(59)=8.79,  $p<0.0001$ ] and 2.5 $\mu$ M [t(59)=12.22,  $p<0.0001$ ].

Overall reserve capacity was not different between the LCL groups (Figure S1D). Reserve capacity decreased as mercury increased [F(6,59)=37.18,  $p<0.0001$ ], but this change was not significantly different between the two LCL groups. Reserve capacity was significantly lower

than baseline at 0.25 $\mu$ M [t(59)=2.44,  $p<0.05$ ], 0.5 $\mu$ M [t(59)=5.64,  $p<0.0001$ ], 1.25 $\mu$ M [t(59)=8.36,  $p<0.0001$ ] and 2.5 $\mu$ M [t(59)=11.23,  $p<0.0001$ ].

#### AD-N LCLs: NAC Pretreatment vs No Pretreatment

As seen in Figure S2A, pretreatment with NAC slightly but significantly increased ATP-linked respiration [F(1,505)=23.00,  $p<0.0001$ ]. ATP-linked respiration for both the pretreated and the non-pretreated AD-N LCLs decreased as mercury increased [F(6,59)=33.65,  $p<0.0001$ ] but this decrease was not different across the two LCL groups. ATP-linked respiration was significantly lower than baseline at 0.125 $\mu$ M [t(59)=2.07,  $p<0.05$ ], 0.25 $\mu$ M [t(59)=3.13,  $p<0.01$ ], 0.5 $\mu$ M [t(59)=4.00,  $p<0.001$ ], 1.25 $\mu$ M [t(59)=7.72,  $p<0.0001$ ] and 2.5 $\mu$ M [t(59)=11.98,  $p<0.0001$ ].

Pretreatment with NAC slightly but significantly increased proton leak respiration [F(1,505)=10.74,  $p=0.001$ ] (Figure S2B). Proton leak respiration for both the pretreated and the non-pretreated AD-N LCLs changed as mercury increased [F(6,59)=3.36,  $p<0.01$ ] but this decrease was not different across the two LCL groups. Proton leak respiration was significantly lower than baseline at 2.5 $\mu$ M [t(59)=3.33,  $p<0.01$ ].

Pretreatment with NAC slightly but significantly increased maximal respiratory capacity [F(1,505)=5.20,  $p<0.05$ ] (Figure S2C). Maximal respiratory capacity for both the pretreated and the non-pretreated AD-N LCLs decreased as mercury increased [F(6,59)=53.11,  $p<0.0001$ ] but this decrease was not different across the two LCL groups. Maximum respiratory capacity was significantly lower than baseline at 0.25 $\mu$ M [t(59)=3.57,  $p<0.001$ ], 0.5 $\mu$ M [t(59)=5.92,  $p<0.0001$ ], 1.25 $\mu$ M [t(59)=10.02,  $p<0.0001$ ] and 2.5 $\mu$ M [t(59)=13.92,  $p<0.0001$ ].

Pretreatment with NAC did not influence overall reserve capacity (Figure S2D). Reserve capacity for both the pretreated and the non-pretreated AD-N LCLs decreased as mercury increased [F(6,59)=47.42,  $p<0.0001$ ] but this decrease was not different across the two LCL groups. Reserve capacity was significantly lower than baseline at 0.25 $\mu$ M [t(59)=3.33,  $p=0.001$ ],

0.5 $\mu$ M [ $t(59)=5.94$ ,  $p<0.0001$ ], 1.25 $\mu$ M [ $t(59)=9.50$ ,  $p<0.0001$ ] and 2.5 $\mu$ M [ $t(59)=12.78$ ,  $p<0.0001$ ].

### Supplementary Figures

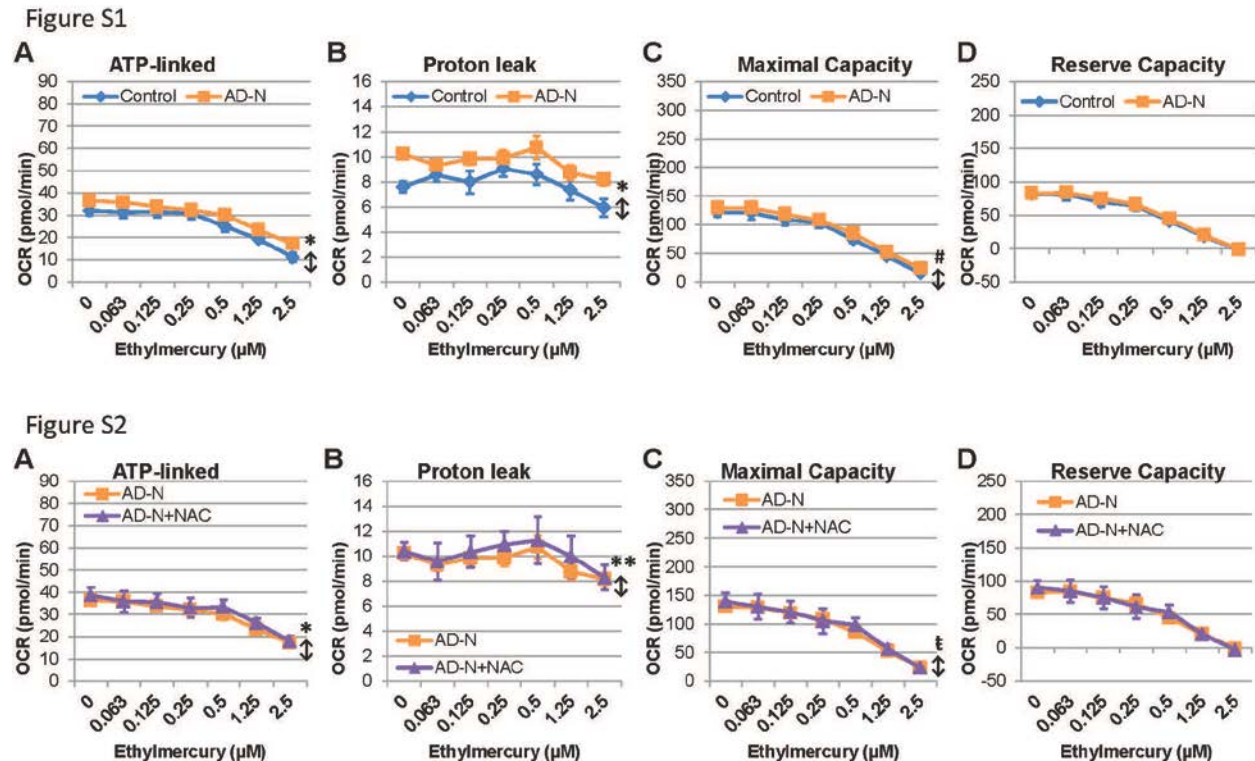

### Supplementary Figure Legends

**Figure S1.** Mitochondrial respiratory parameters and responses to mercury in the AD-N LCL subgroup. Overall, the AD-N subgroup demonstrates similar mitochondrial responses as the control LCLs. (A) ATP-linked respiration (B) proton leak respiration and (C) maximal respiratory capacity are overall slightly but significantly higher in the AD-N LCLs as compared to controls. \* $p\leq 0.0001$ ; #  $p\leq 0.01$ ; ‡ indicates an overall statistical difference between LCL groups when differences at individual concentrations of mercury are not significant.

**Figure S2.** Mitochondrial respiratory parameters and responses to mercury in the AD-N LCL subgroup following 48 hour pretreatment with 1mM N acetyl-cysteine (NAC). Overall, changes in mitochondrial function with increased mercury seen in the AD-N subgroup are not drastically different following NAC pretreatment. (A) ATP-linked respiration, (B) proton leak respiration and (C) maximum respiratory capacity are slightly but significantly higher in the NAC pretreated group as compared to the not pretreated group. \* $p\leq 0.0001$ ; \*\* $p\leq 0.001$ ; †  $p\leq 0.05$ ; ‡ indicates an overall statistical difference between LCL groups when differences at individual concentrations of mercury are not significant.
